Title: THE SENSITIVITY OF END-TIDAL NITROGEN IN THE DETECTION OF BOLUS VENOUS AIR EMBOLISM IN DOGS

Authors: M. J. Matjasko, M.D., P. H. Petrozza, M.D., M. A. Cohen, M.D., C. F. Mackenzie, M.D.

Affiliation: Department of Anesthesiology, University of Maryland School of Medicine, Baltimore, Maryland 21201

**Introduction.** End-tidal nitrogen ( $\text{ETN}_2$ ) measured by mass spectrometry (MS) has been used to quantitate bolus venous air embolism (BVAE).<sup>1</sup> This study was done to compare the sensitivity of  $\text{ETN}_2$  concentration measured by MS with other clinical detection methods (precordial Doppler (PD), end-tidal  $\text{CO}_2$  ( $\text{ETCO}_2$ ), and mean pulmonary artery pressure (PAP)) during graded BVAE.

**Methods.** Five preconditioned mongrel dogs (10-17 kg) were anesthetized with IV pentobarbital 30 mgm/kg, intubated, and ventilated with a volume cycled ventilator (Engstrom 312) at an  $\text{FIO}_2$  of 1.0 (0.04%  $\text{N}_2$  contamination) to maintain  $\text{PaCO}_2$  between 35-40 mmHg, checked prior to each VAE. Anesthesia was maintained by constant infusion of low dose thiamylal and pancuronium 0.1 mg/kg/h. Maintenance fluids were given at 5 cc/kg/h. Direct blood pressure and blood gases were obtained from a femoral arterial catheter; a pulmonary artery catheter was inserted to the wedge position and the balloon deflated. A forelimb vein was used for air injection by hand over 5 seconds. One hour of denitrogenation preceded BVAE.

Mean arterial pressure (MAP), PAP, PD,  $\text{ETN}_2$ ,  $\text{ETCO}_2$  (Medspec II MS) were displayed continuously on a strip chart recorder. Temperature was maintained between 36-37°C. Pressure transducers were calibrated to atmospheric pressure and a 50 mmHg fluid column. The MS was calibrated with 3 gas combinations: room air; 100%  $\text{O}_2$ ; and  $\text{N}_2$  3.5%,  $\text{CO}_2$  5.5%,  $\text{O}_2$  91% (factory calibrated  $\pm 0.003\%$ ). The MS sensitivity for  $\text{N}_2$  and  $\text{CO}_2$  was 0.01% and 0.1% respectively. Calibration of the MS was verified at the end of the experiment and was stable. Baseline (BL) measurements were taken prior to each BVAE (.25, .5, .75, 1.0 cc/kg) and 20-30 minutes were allowed for return of all parameters to BL. In preliminary studies, these doses caused minimal changes in cardiovascular dynamics.

Following each BVAE, the time to appearance and magnitude of the initial and peak changes in  $\text{ETN}_2$ ,  $\text{ETCO}_2$ , PAP were observed.  $\text{PaCO}_2$  and  $\text{PaO}_2$  were measured at the time of maximal depression of  $\text{ETCO}_2$ . Changes in MAP, PAP were measured at end-expiration. Intrapulmonary shunt and cardiac output were not measured.

The pooled standard deviation (SD) of the baseline ET ( $\text{N}_2$  and  $\text{CO}_2$ ) values was .0074% and .092% respectively. Changes in ET values after BVAE were considered significant if they exceeded BL values by 3SD. A change in PAP was considered significant if it exceeded BL by 25%. The Wilcoxon paired sample rank sum test and the t-test for paired differences were used in data analysis.

**Results.** Changes in the PD sounds were heard with all air doses in all animals.  $\text{ETN}_2$ : The peak increase in  $\text{ETN}_2$  ( $\Delta\text{max}$ ) was dose-related and significant in all animals at all air doses (Table 1). The time to  $\Delta\text{max}$   $\text{ETN}_2$  was earlier than  $\Delta\text{max}$   $\text{ETCO}_2$  after all BVAEs ( $p < .05$ ). The time to peak  $\text{ETN}_2$  and  $\text{ETCO}_2$  decreased with increasing air doses and  $\Delta\text{max}$   $\text{ETN}_2$  was not significantly

earlier than  $\Delta\text{max}$  PAP (Table 2).  $\text{ETCO}_2$ : The peak decrease in  $\text{ETCO}_2$  was dose-related and significant in all animals at all doses. The  $\Delta\text{max}$  in  $\text{PaCO}_2$  and a-ADCO<sub>2</sub> were dose-related (Table 1). The time to  $\Delta\text{max}$   $\text{ETCO}_2$  was later than  $\Delta\text{max}$   $\text{ETN}_2$  in all BVAEs (Table 2). **PAP:** The increase in PAP was significant in 2 of 5 animals at .25 cc/kg BVAE, in 4 of 5 animals at .5 cc/kg and in all animals at .75 and 1 cc/kg. The absolute increase in PAP was dose-related (Table 1). The time to  $\Delta\text{max}$  PAP was intermediate compared to  $\Delta\text{max}$   $\text{ETN}_2$  and  $\Delta\text{max}$   $\text{ETCO}_2$  (Table 2).

**MAP:** The maximum decrease in MAP was 10% or less at all doses. The time to return to BL of all parameters was between 3 and 30 minutes and was not dose-related.  $\text{PaO}_2$  did not change more than 10 mmHg in any animal at any BVAE dose at the time of maximum depression of  $\text{ETCO}_2$ . The animals were not terminated therefore there was no definitive indication that pulmonary and cardiac abnormalities were absent.

**Discussion.**  $\text{ETN}_2$  is as sensitive as  $\text{ETCO}_2$  in the detection of BVAE and more sensitive than PAP. Increases in  $\text{ETN}_2$  are more often diagnostic than increases in PAP and they occur approximately 60 seconds prior to decreases in  $\text{ETCO}_2$  at all air doses. The time to  $\Delta\text{max}$   $\text{ETN}_2$  vs  $\Delta\text{max}$   $\text{ETCO}_2$  is reduced with increasing air doses. The shorter the difference in time to appearance of changes in  $\text{ETN}_2$  compared to  $\text{ETCO}_2$  may support the clinical diagnosis of BVAE or large infusion VAE.

Table 1: Maximum Change (mean  $\pm$  SD) from Pre-Embolism Control (BVAE)

| cc/kg                         | .25             | .50              | .75              | 1.0              |
|-------------------------------|-----------------|------------------|------------------|------------------|
| $\Delta$ $\text{ETN}_2$ %     | .04 $\pm$ .02*  | .14 $\pm$ .1*    | .16 $\pm$ .09*   | .26 $\pm$ .20*   |
| $\Delta$ $\text{ETCO}_2$ %    | .52 $\pm$ .16*  | 1.0 $\pm$ .24**  | 1.60 $\pm$ .35** | 1.7 $\pm$ .57*   |
| $\Delta$ PAP mmHg             | 2.8 $\pm$ 1.3*  | 5.4 $\pm$ 3.7*   | 9.5 $\pm$ 5.5*   | 14.6 $\pm$ 7.92* |
| $\Delta$ $\text{PaCO}_2$ mmHg | 1.3 $\pm$ 1.0*  | 3.7 $\pm$ 2.7*   | 4.7 $\pm$ 1.9*   | 4.1 $\pm$ 3.1*   |
| a-A D $\text{CO}_2$ mmHg      | 8.2 $\pm$ 1.6** | 15.8 $\pm$ 2.5** | 21.5 $\pm$ 3.2** | 24.5 $\pm$ 3.9** |

\* $p < .05$  \*\* $p < .001$

Table 2: Time to  $\Delta$  max (mean  $\pm$  SD) (seconds) (BVAE)

| cc/kg             | .25           | .50          | .75         | 1.0         |
|-------------------|---------------|--------------|-------------|-------------|
| $\text{ETN}_2$ %  | 39 $\pm$ 4    | 37 $\pm$ 14  | 35 $\pm$ 3  | 32 $\pm$ 8  |
| $\text{ETCO}_2$ % | 106 $\pm$ 39  | 103 $\pm$ 37 | 99 $\pm$ 32 | 95 $\pm$ 56 |
| PAP mmHg          | 144 $\pm$ 120 | 43 $\pm$ 27  | 42 $\pm$ 20 | 57 $\pm$ 34 |

<sup>1</sup>Losee JM, Sherill D, Virtue RW, Lechner AJ: Quantitative detection of venous air embolism in the dog by mass spectrometry measurement of end-tidal nitrogen. Anesthesiol 57:A146, 1983.

This work supported in part by a grant from the Pangborn Fund of the University of Maryland.
